RESEARCH ARTICLE

# Vulnerabilities in Older Patients when Cancer Treatment is Initiated: Does a Cognitive Impairment Impact the Two-Year Survival?

Yves Libert<sup>1,2☯‡</sup>, Stéphanie Dubruille<sup>1,2☯‡</sup>, Cindy Borghgraef<sup>1,2</sup>, Anne-Marie Etienne<sup>3</sup>, Isabelle Merckaert<sup>1,2</sup>, Marianne Paesmans<sup>2</sup>, Christine Reynaert<sup>4</sup>, Myriam Roos<sup>2</sup>, Jean-Louis Slachmuylder<sup>1</sup>, Sandrine Vandenbossche<sup>2</sup>, Dominique Bron<sup>2</sup>, Darius Razavi<sup>1,2\*</sup>

**1** Université Libre de Bruxelles, Faculté des Sciences Psychologiques et de l'Éducation, Brussels, Belgium, **2** Université Libre de Bruxelles, Institut Jules Bordet, Brussels, Belgium, **3** Université de Liège, Faculté des Sciences psychologiques et de l'Éducation, Liège, Belgium, **4** Université Catholique de Louvain, Service de Médecine Psychosomatique, Cliniques Universitaires de Mont-Godinne, Yvoir, Belgium

☯ These authors contributed equally to this work.

‡ These authors are co-first authors on this work.

\* [drazavi@ulb.ac.be](mailto:drazavi@ulb.ac.be)

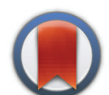

CrossMark  
click for updates

OPEN ACCESS

**Citation:** Libert Y, Dubruille S, Borghgraef C, Etienne A-M, Merckaert I, Paesmans M, et al. (2016) Vulnerabilities in Older Patients when Cancer Treatment is Initiated: Does a Cognitive Impairment Impact the Two-Year Survival? PLoS ONE 11(8): e0159734. doi:10.1371/journal.pone.0159734

**Editor:** David Fardo, University of Kentucky, UNITED STATES

**Received:** January 20, 2016

**Accepted:** July 7, 2016

**Published:** August 1, 2016

**Copyright:** © 2016 Libert et al. This is an open access article distributed under the terms of the [Creative Commons Attribution License](https://creativecommons.org/licenses/by/4.0/), which permits unrestricted use, distribution, and reproduction in any medium, provided the original author and source are credited.

**Data Availability Statement:** Ethical restrictions prohibit the public deposition of the data. This study assessed associations between vulnerabilities in older patients when cancer treatment is initiated and two-year survival. All patients signed informed consent and the guarantee of an anonymous treatment of their data was offered. After two years of follow-up, only 24 patients died. This small number and the fact that all patients are from the same hospital weakens the guarantee of anonymity if the data are publicly available, especially regarding the

## Abstract

### Introduction

Dementia is a known predictor of shorter survival times in older cancer patients. However, no empirical evidence is available to determine how much a cognitive impairment shortens survival in older patients when cancer treatment is initiated.

### Purpose

To longitudinally investigate how much a cognitive impairment detected at the initiation of cancer treatment influences survival of older patients during a two-year follow-up duration and to compare the predictive value of a cognitive impairment on patients survival with the predictive value of other vulnerabilities associated with older age.

### Methods

Three hundred and fifty-seven consecutive patients ( $\geq 65$  years old) admitted for breast, prostate, or colorectal cancer surgeries were prospectively recruited. A cognitive impairment was assessed with the Montreal Cognitive Assessment (MoCA $<26$ ). Socio-demographic, disease-related, and geriatric vulnerabilities were assessed using validated tools. Univariate and subsequent multivariate Cox proportional hazards models stratified for diagnosis (breast/prostate cancer *versus* colorectal cancer) and disease status (metastatic *versus* non-metastatic) were used.

### Results

A cognitive impairment was detected in 46% ( $n = 163$ ) of patients. Survival was significantly influenced by a cognitive impairment (HR = 6.13; 95% confidence interval [CI] = 2.07–

deceased. Data are available upon request to the corresponding author (YL).

**Funding:** This research program was supported by the National Cancer Plan of Belgium 2009-2011; grant number: NKP-24-005 (Cindy Kenis and Pr. Hans Wildfires), the Centre de Psycho-Oncology (Training and Research Group) of Belgium, the Institute Jules Bordet, the University Libre de Bruxelles, the University Catholique de Louvain and by a grant provided by the "Fonds National de la Recherche Scientifique – Section Télévie" of Belgium. The funders had no role in study design, data collection and analysis, decision to publish, or preparation of the manuscript.

**Competing Interests:** The authors have declared that no competing interests exist.

18.09;  $p = 0.001$ ), a loss in instrumental autonomy (IADL  $\leq 7$ ) (HR = 3.06; 95% CI = 1.31–7.11;  $p = 0.009$ ) and fatigue (Mob-T < 5) (HR = 5.98; 95% CI = 2.47–14.44;  $p < 0.001$ ).

## Conclusions

During the two years following cancer treatment initiation, older patients with a cognitive impairment were up to six times more likely to die than patients without. Older patients should be screened for cognitive impairments at cancer treatment initiation to enable interventions to reduce morbidity and mortality. Further studies should address processes underlying the relationship between cognitive impairments and an increased risk of dying in older cancer patients.

## Introduction

When starting cancer treatment, identifying sociodemographic, disease-related, and geriatric frailties that could increase morbidity and mortality among older patients has been recommended[1]. Frailties such as dementia have been recognized as predictor of shortened survival [2–5]. Indirect evidence suggests that cognitive impairments are also predictors of shortened survival in older cancer patients[6]–8. Although a recent study showed that approximately one-half of elderly cancer patients present with signs of cognitive impairments at cancer treatment initiation[7], no empirical evidence is currently available regarding how much a cognitive impairment influences survival in these patients.

At cancer treatment initiation, cognitive impairments in older patients could potentially shorten survival because they are associated with biological, medical, psychological, and/or social vulnerabilities. At the biological level, the presence of cognitive impairments has been associated with biomarkers that are associated with reduced life-expectancy. These biomarkers indicate changes such as advanced cell senescence, increased inflammation, decreased hormonal level, DNA damage, oxidative stress, or decrease in telomere length[8–11]. Cognitive impairments have also been associated with various comorbidities (poor cardiovascular conditions, diabetes, anemia, hypertension, or vitamin D deficiency[12]) and unhealthy lifestyles (low levels of physical activity, smoking, or alcohol abuse[11,12]) that have been shown to be associated with shortened life-expectancies in older people.

At the medical level, as it has been reported for dementia, cognitive impairments may be associated with an advanced stage of cancer at diagnosis[13]. Cognitive impairments may also be risk factors for delirium occurring during cancer treatments, which is a complication that has been recognized as a risk factor for a shorter life-expectancy among older patients[14]. Finally, cognitive impairments could be risk factors for an adjuvant under- or over-treatment of older patients. On one hand, not giving chemotherapy to some patients because of cognitive impairments may prevent them from potential remission. However, giving chemotherapy to patients with cognitive impairments may result in severe side effects that ultimately lead to life-threatening adverse events when these impairments are markers of underlying frailty or deficit in physiological function.

At the psychological level, the presence of cognitive impairments has been associated with characteristics recognized as risk factors for reduced life expectancies of older people in general and of older cancer patients in particular. These include anxiety, depression, distress, fatigue, low cognitive reserve, or neuropsychological disorders[15]. Finally, at the social level, cognitive impairments have been associated with low education levels and social isolation[16] that have

been recognized as risk factors for reduced life expectancies in older people. Moreover, cognitive impairments may impair the abilities of older cancer patients to remember and implement recommendations from their relatives or health care professionals, specifically regarding cancer treatment (increase the risk of non-adherence) and the management of acute symptoms such as fever, nausea, or pain (increase the risk of life-threatening adverse events). These causes should be investigated as reasons why survival of older patients with cognitive impairments would be decreased.

Although previous studies identified various geriatric frailties that could shorten survival of older cancer patients, none examined precisely how much a cognitive impairment at the time of cancer treatment initiation could predict survival. Regarding cognitive frailties, these studies mainly assessed cognitive impairments based on patients' medical records, with the brief mental status test or with the MMSE (Mini Mental State Examination). Although these assessment methods are useful to detect severe cognitive impairments in clinical practice, they are less sensitive to subtle impairments like criteria for a Mild Cognitive Impairment (MCI)[17–19] (i.e. concern regarding a change in cognition, impairment in one or more cognitive domains, preservation of independence in functional abilities and not demented). MCI is currently considered to be a transitional impairment between the cognitive changes of normal aging and the earliest clinical features of dementia[20]. However, it should be recalled at this level that among MCI patients, about 20% do not convert to dementia[21].

The Montreal Cognitive Assessment (MoCA) is a screening tool that has been specifically designed to assess MCI and dementia in first line specialty clinics[17]. However, in clinical and research state of the art, MoCA can be used to screen for cognitive impairments that may have other conditions that are ultimately diagnosed including delirium, long-standing cognitive impairment. These patients may not have the same risk of progression to dementia and it may be a disservice to patients and families if a diagnosis such as MCI or dementia is communicated. In order to reduce these risks, a comprehensive assessment including other health care professionals such as neuropsychologists and medical specialists in memory disorders should be conducted.

This study investigates prospectively, how much a cognitive impairment detected at the time of cancer treatment initiation predicts survival during a two-year follow-up duration in older patients, and to compare the predictive value of a cognitive impairment on patients survival with the predictive value of other vulnerabilities associated with older age. Patients were excluded if they were hospitalized in a palliative care unit and if they had dementia (i.e. loss of functional autonomy, disorientation, and severe memory problems). A two-year follow-up was performed, as this period was considered as the optimal time required for study deaths that could occur during surgery, adjuvant treatments, and recovery.

## Material and Methods

### Patients and setting

This longitudinal study was conducted in the medical-oncology department of a Belgian cancer center and was approved by the local ethics committee. All consecutive patients fulfilling the inclusion criteria were invited to participate and provided written informed consent. Patients were not compensated for their participation. To fulfill the inclusion criteria, patients had to be at least 65 years old, suffering from one of three types of cancer (breast, prostate, or colorectal) regardless of the disease stage, be hospitalized for cancer surgery, and be able to speak French. Patients were excluded if they were hospitalized in a palliative care unit, if they had a neoadjuvant therapy, if they had dementia (i.e. loss of functional autonomy, disorientation, and severe memory problems), if they were unable to adhere to the assessment schedule in this study for

physical or psychological reasons. Recruited patients who were not recorded in the Belgium national population register ( $n = 4$ ) were excluded. The first assessment (vulnerabilities assessments) was conducted in patients' rooms during the first 48 hours after their admission or the second day following surgery if they could not be seen within the first 48 hours. The second assessment (evaluations of postoperative characteristics and main causes of death) was conducted 2 years later based on the patients' medical records, on the Belgium national population register and on a phone contact with their general practitioner when necessary. The data used in the current longitudinal study have been partly used in a previously cross-sectional study addressing older cancer patients' desire for a formal psychological help[7].

## Study and assessment procedure

**The first assessment.** First assessment lasted approximately one hour and was assisted by an independent investigator. Patients provided demographic information including age, gender, educational level, and living status. Physicians provided disease-related characteristics of patients including diagnosis, disease recurrence status, disease metastatic status, and intent to treat (adjuvant chemotherapy scheduled or not). The severity of surgery was measured by the Physiological and Operative Severity Scoring system for enumeration of Mortality and morbidity (POSSUM)[22].

Cognitive impairments were assessed using the Montreal Cognitive Assessment (MoCA) [17]. As systematically, the MMSE was realized before the MoCA, similar items such as the orientation and the attention tests were made only once. As the MMSE is well-known, only the MoCA will be described here.

The MoCA screening test requires respondents to answer questions, read instructions, and perform tasks with a writing instrument. The MoCA was developed to screen for a probable MCI. The MoCA is a one-page document that measures 8 cognitive domains: visuospatial/executive (5 points), naming (3 points), attention (6 points), language (3 points), abstraction (2 points), delayed recall (5 points), and orientation (6 points). Scores on the MoCA can range from 0 to 30. One point is added for an individual who has 12 years or fewer of formal education. A cut-off score of  $<26$  is used to detect cognitive impairments. With this cut-off the MoCA has a sensitivity of 90% and a specificity of 87% to detect a probable MCI in older patients[17]. However, MoCA sensitivity and specificity have been found to vary tremendously in different clinical populations[23].

Finally, geriatric vulnerabilities of each patient were assessed using the following validated tools: Activities of Daily Living (ADL)[24], Instrumental Activities of Daily Living (IADL)[25], Timed up & Go test (TUG)[26], Falls during the last year (Falls), Mobility-Tiredness scale (Mob-T)[27], Mini Nutritional Assessment (MNA)[28], Hospital Anxiety and Depression Scale (HADS)[29], Geriatric Depression Scale in four items (GDS-4)[30], number of drugs (drugs)[31], Charlson Comorbidity Index (CCI)[32]. Each test used score cut-offs that were derived from the literature (ADL  $\leq 5$ , IADL  $\leq 7$ , TUG  $\geq 15$ , Falls  $\geq 2$ , Mob-T  $< 5$ , MNA  $\leq 23.5$ , HADS  $\geq 13$ , GDS-4  $\geq 1$ , Drugs  $\geq 5$ , CCI  $\geq 2$ ). Although the cut-off of the HADS is usually 11, the recommended cut-off score of 13 in the French version of the HADS was used as it gives 75% sensitivity and 75% specificity for screening for adjustment disorders and major depressive disorders taken together[33].

**The second assessment.** Medical records provided postoperative characteristics of patients including the length of postoperative stay and the short-term postoperative complications. Dates of deaths were extracted from the Belgium national population register allowing to ensure that all deaths were counted. Finally, main causes of death were extracted from the patients' medical records and/or provided by the patients' general practitioner. Length of

postoperative stay was defined as the number of days spent in hospital after surgery. Postoperative complications were defined as any complication ( $\geq$  grade I) during the hospitalization following surgery.

## Statistical analyses

The study endpoint was overall survival measured from the Belgium national population register. Deaths occurring after 2 years of follow-up were not taken into consideration (observations were censored at 2 years). Univariate Cox regression analysis was performed in order to assess the relationships between each sociodemographic, disease-related, a cognitive impairment (based on the MoCA score), or other geriatric vulnerabilities and survival. Since this analysis was limited by the number of deaths observed after two years of follow-up ( $n = 24$ ), extensive multivariate analyses could not be performed (it is recommended to have at least 10 events per covariate to be included in a model). However, in order to control for the impact of major disease-related covariates, subsequent multivariate Cox regression analyses that were stratified for diagnosis (breast/prostate *versus* colorectal) and disease status (metastatic *versus* non-metastatic) were performed in order to assess the relationship between a cognitive impairment or other geriatric vulnerabilities and survival (separate models for each geriatric vulnerability). These two stratifying medical variables were chosen because they may have a potential higher impact on survival than other assessed variables. Regarding diagnosis, we compared breast/prostate versus colorectal cancer because mortality rates of breast and prostate cancers are quite similar among older cancer patients and comparatively lower than mortality rates of colorectal cancer [34]. Stratified models were fitted only for covariates with univariate  $p$  values  $< 0.05$ . The effect of each characteristic on patient survival was expressed as hazard ratio (HR) with the corresponding 95% confidence interval (CI). In order to assess what could be other confounding factors for the prognostic role of a cognitive impairment on survival, associations between a cognitive impairment and sociodemographic, disease-related, and other geriatric vulnerabilities were assessed using appropriate parametric or non-parametric tests (Pearson and Spearman correlation coefficients, Student's  $t$ -test, Mann-Whitney  $U$  test, and  $\chi^2$ -test). Kaplan-Meier survival estimates were also generated to compare survival of patients with and without cognitive impairment. Statistical significance was defined as  $p < 0.05$ . All statistical tests were two-sided. Statistical analyses were performed using SPSS software (IBM SPSS Statistics (v. 22); SPSS, Inc., Chicago, IL, USA).

## Results

### Patients' recruitment, follow-up, and vulnerabilities

Of the 559 eligible patients, 89 refused to take part in the study and 113 inpatients were excluded because they did not answer the MoCA and decided to stop completing the questionnaire. The final sample consisted of 357 patients for whom 24 deaths were observed in the Belgium national population register. It should be noted that 30% of the recruited patients were assessed the second day following surgery. The sociodemographic, disease-related, a cognitive impairment, and other geriatric vulnerabilities of survivors and non-survivors at 2 years are listed in Tables 1 and 2.

### Patients' cognitive impairments

A cognitive impairment was experienced by 46% of the recruited older patients according to the MoCA scores. The mean MoCA score was 25.4 ( $SD = 3.6$ ) and the score values ranged from a minimum of 10 to a maximum of 30. It should be underlined that none ( $n = 0$ ) of older

**Table 1. Sociodemographic and disease-related characteristics of older patients at the time of cancer treatment initiation, stratified for Survivors/ Non-Survivors at 2 years (n = 357).**

|                                                         | All (n = 357) |    | Survivors (n = 333) |    | Non-Survivors (n = 24) |    |
|---------------------------------------------------------|---------------|----|---------------------|----|------------------------|----|
|                                                         | N             | %  | N                   | %  | N                      | %  |
| <b>Sociodemographic characteristics</b>                 |               |    |                     |    |                        |    |
| <b>Age (years)</b>                                      |               |    |                     |    |                        |    |
| Mean                                                    | 72            |    | 72                  |    | 74                     |    |
| SD                                                      | 6             |    | 6                   |    | 6                      |    |
| <b>Gender</b>                                           |               |    |                     |    |                        |    |
| Men                                                     | 112           | 31 | 102                 | 31 | 10                     | 42 |
| Women                                                   | 245           | 69 | 231                 | 69 | 14                     | 58 |
| <b>Educational level</b>                                |               |    |                     |    |                        |    |
| Junior high school or lower                             | 212           | 59 | 196                 | 59 | 16                     | 67 |
| High school graduation or higher degree                 | 145           | 41 | 137                 | 41 | 8                      | 33 |
| <b>Living status*</b>                                   |               |    |                     |    |                        |    |
| Alone                                                   | 121           | 34 | 112                 | 34 | 9                      | 38 |
| With partner, family, in nursing home or in institution | 235           | 66 | 220                 | 66 | 15                     | 62 |
| <b>Disease-related characteristics</b>                  |               |    |                     |    |                        |    |
| <b>Diagnosis</b>                                        |               |    |                     |    |                        |    |
| Breast cancer                                           | 228           | 64 | 217                 | 65 | 11                     | 46 |
| Prostate cancer                                         | 93            | 26 | 88                  | 26 | 5                      | 21 |
| Colorectal cancer                                       | 36            | 10 | 28                  | 9  | 8                      | 33 |
| <b>Disease recurrence</b>                               |               |    |                     |    |                        |    |
| Initial cancer                                          | 296           | 83 | 284                 | 85 | 12                     | 50 |
| Cancer relapse                                          | 61            | 17 | 49                  | 15 | 12                     | 50 |
| <b>Disease status</b>                                   |               |    |                     |    |                        |    |
| Non-metastatic                                          | 316           | 89 | 307                 | 92 | 9                      | 38 |
| Metastatic                                              | 41            | 11 | 26                  | 8  | 15                     | 62 |
| <b>Intent to treat</b>                                  |               |    |                     |    |                        |    |
| Adjuvant chemotherapy scheduled                         | 94            | 26 | 80                  | 24 | 14                     | 58 |
| Adjuvant chemotherapy not scheduled                     | 263           | 74 | 253                 | 76 | 10                     | 42 |
| <b>Severity of surgery**</b>                            |               |    |                     |    |                        |    |
| Low-Middle (I-II)                                       | 318           | 89 | 304                 | 90 | 15                     | 62 |
| High-Very high (III-IV)                                 | 39            | 11 | 33                  | 10 | 9                      | 38 |
| <b>Postoperative length (days)</b>                      |               |    |                     |    |                        |    |
| Mean                                                    | 5             |    | 5                   |    | 8                      |    |
| SD                                                      | 6             |    | 5                   |    | 7                      |    |
| <b>Postoperative complications***</b>                   |               |    |                     |    |                        |    |
| Yes                                                     | 15            | 4  | 12                  | 4  | 3                      | 13 |
| No                                                      | 342           | 96 | 321                 | 96 | 21                     | 87 |
| <b>Causes of death</b>                                  |               |    |                     |    |                        |    |
| Disease progression                                     | -             | -  | -                   | -  | 20                     | 83 |
| Cardiovascular disease                                  | -             | -  | -                   | -  | 3                      | 13 |
| Infection                                               | -             | -  | -                   | -  | 1                      | 4  |

\*Percentages do not take missing data into account

\*\*Assessed with the Possum scale

\*\*\*Any medical complication reported in medical records; 2 patients had declared a delirium after surgery

doi:10.1371/journal.pone.0159734.t001



**Table 2. Cognitive Impairment (CI) and other geriatric vulnerabilities of older patients at the time of cancer treatment initiation, stratified for Survivors/Non-Survivors at 2 years (n = 357).**

|                                                       | All (n = 357) |    | Survivors (n = 333) |    | Non-Survivors (n = 24) |    |
|-------------------------------------------------------|---------------|----|---------------------|----|------------------------|----|
|                                                       | N             | %  | N                   | %  | N                      | %  |
| <b>Cognitive Impairment (CI)</b>                      |               |    |                     |    |                        |    |
| <b>Montreal Cognitive Assessment (MoCA)*</b>          |               |    |                     |    |                        |    |
| Impaired                                              | 163           | 46 | 143                 | 43 | 20                     | 83 |
| Not impaired                                          | 194           | 54 | 190                 | 57 | 4                      | 17 |
| <b>Other geriatric vulnerabilities**</b>              |               |    |                     |    |                        |    |
| <b>Mini Mental State Examination (MMSE)</b>           |               |    |                     |    |                        |    |
| Vulnerable                                            | 47            | 13 | 45                  | 14 | 2                      | 8  |
| Not vulnerable                                        | 310           | 87 | 288                 | 86 | 22                     | 92 |
| <b>Activities of Daily Living (ADL)</b>               |               |    |                     |    |                        |    |
| Vulnerable                                            | 8             | 2  | 7                   | 2  | 1                      | 4  |
| Not vulnerable                                        | 349           | 98 | 326                 | 98 | 23                     | 96 |
| <b>Instrumental Activities of Daily Living (IADL)</b> |               |    |                     |    |                        |    |
| Vulnerable                                            | 61            | 17 | 52                  | 16 | 9                      | 38 |
| Not vulnerable                                        | 296           | 83 | 281                 | 84 | 15                     | 62 |
| <b>Time-up and Go test (TUG)***</b>                   |               |    |                     |    |                        |    |
| Vulnerable                                            | 9             | 3  | 8                   | 3  | 1                      | 5  |
| Not vulnerable                                        | 248           | 97 | 325                 | 97 | 23                     | 95 |
| <b>Falls during the last year (Falls)***</b>          |               |    |                     |    |                        |    |
| Vulnerable                                            | 24            | 7  | 21                  | 6  | 2                      | 8  |
| Not vulnerable                                        | 333           | 93 | 312                 | 94 | 22                     | 92 |
| <b>Mobility-tiredness scale (Mob-t)</b>               |               |    |                     |    |                        |    |
| Vulnerable                                            | 119           | 33 | 103                 | 31 | 16                     | 67 |
| Not vulnerable                                        | 238           | 67 | 230                 | 69 | 8                      | 33 |
| <b>Mini Nutritional Assessment (MNA)</b>              |               |    |                     |    |                        |    |
| Vulnerable                                            | 58            | 16 | 52                  | 16 | 6                      | 25 |
| Not vulnerable                                        | 299           | 84 | 281                 | 84 | 18                     | 75 |
| <b>Hospital Anxiety and Depression Scale (HADS)</b>   |               |    |                     |    |                        |    |
| Vulnerable                                            | 114           | 32 | 103                 | 31 | 11                     | 46 |
| Not vulnerable                                        | 243           | 68 | 230                 | 69 | 13                     | 54 |
| <b>Geriatric Depression Scale four items (GDS-4)</b>  |               |    |                     |    |                        |    |
| Vulnerable                                            | 216           | 61 | 200                 | 60 | 16                     | 67 |
| Not vulnerable                                        | 141           | 39 | 133                 | 40 | 8                      | 33 |
| <b>Number of drugs (Drugs)</b>                        |               |    |                     |    |                        |    |
| Vulnerable                                            | 112           | 31 | 104                 | 31 | 8                      | 33 |
| Not vulnerable                                        | 245           | 69 | 229                 | 69 | 16                     | 67 |
| <b>Charlson Comorbidity Index (CCI)</b>               |               |    |                     |    |                        |    |
| Vulnerable                                            | 184           | 52 | 166                 | 50 | 18                     | 75 |
| Not vulnerable                                        | 173           | 48 | 167                 | 50 | 6                      | 25 |

\*The cut-off point of <26 is used to detect CI

\*\*Each tool was scored on a dichotomous scale, based on individual cut-off points reported in the literature

\*\*\*Percentages do not take missing data into account

doi:10.1371/journal.pone.0159734.t002

cancer patients experienced a severe cognitive impairment (0–9 regarding MoCA scores), 9% (n = 30) experienced a moderate cognitive impairment (10–19 regarding MoCA scores) and 37% (n = 133) experienced a mild cognitive impairment (20–25 regarding MoCA scores).

MoCA scores were associated with IADL ( $r = 0.161$ ;  $p = 0.002$ ), TUG ( $r = -0.211$ ;  $p < 0.001$ ), Mob-t ( $r = 0.216$ ;  $p < 0.001$ ), MMSE ( $r = 0.650$ ;  $p < 0.001$ ), HADS ( $r = -0.194$ ;  $p < 0.001$ ), number of drugs ( $r = -0.169$ ;  $p = 0.001$ ), age ( $r = -0.321$ ;  $p < 0.001$ ), and a lower educational level ( $p < 0.001$ ). There was no significant difference between MoCA scores of patients assessed within the first 48 hours of their hospital stay ( $n = 252$ ; 70%;  $M = 25.6$ ;  $SD = 3.5$ ) and those assessed the second day following surgery ( $n = 105$ ; 30%;  $M = 24.8$ ;  $SD = 3.8$ ) ( $p = 0.063$ ).

### Prediction of patients' two-year survival

Characteristics associated with survival among older patients (univariate Cox regressions) are listed in [Table 3](#). Among the sociodemographic and disease-related characteristics, the diagnosis ( $p < 0.001$ ), disease recurrence status ( $p < 0.001$ ), disease metastatic status ( $p < 0.001$ ), intent to treat ( $p = 0.001$ ), severity of surgery ( $p < 0.001$ ), postoperative length ( $p = 0.016$ ), and postoperative complications ( $p = 0.038$ ) predicted survival. A cognitive impairment measured with a cut-off score (MoCA  $< 26$ ) ( $p = 0.001$ ) and as a continuous variable ( $p = 0.017$ ) predicted survival. The small number of deaths ( $n = 24$ ) did not allow to see whether subgroups with severe versus milder cognitive impairment experience similar rates of mortality. Among other geriatric vulnerabilities, loss of autonomy (IADL  $\leq 7$ ) ( $p = 0.008$ ), fatigue (Mob-T  $< 5$ ) ( $p = 0.001$ ), and comorbidities (CCI  $> 1$ ) ( $p = 0.023$ ) were predictive for survival.

Cognitive impairments and other geriatrics vulnerabilities associated with survival of older patients (subsequent multivariate Cox regressions stratified for diagnosis and disease metastatic status) are listed in [Table 4](#). Overall survival was predicted by a cognitive impairment (MoCA  $< 26$ ) (HR = 6.13; 95% CI = 2.07–18.09;  $p = 0.001$ ), loss of instrumental autonomy (IADL  $\leq 7$ ) (HR = 3.06; 95% CI; 1.31–7.11;  $p = 0.009$ ) and fatigue (Mob-T  $< 5$ ) (HR = 5.98; 95% CI; 2.47–14.44;  $p < 0.001$ ). [Fig 1](#) shows the Kaplan-Meier plot of survival between patients without a cognitive impairment (MoCA  $\geq 26$ ) and patients with a cognitive impairment (MoCA  $< 26$ ). Patients with a cognitive impairment had a higher mortality risk ( $p < 0.001$ ) and the majority of deaths occurred after one-year (62%). The majority of patients (83%) died due to a disease progression.

### Discussion

The first aim of this longitudinal study was to investigate how much a cognitive impairment assessed by the MoCA when cancer treatment is initiated and assessed by the MoCA, predicted survival in older cancer patients. A cognitive impairment was detected in 46% of the 337 recruited older patients. The total mortality rate for patients was 7% ( $n = 24$ ) after two years. During the two years following surgery, when stratified by diagnosis (breast/prostate cancer *versus* colorectal cancer) and disease status (metastatic *versus* non-metastatic), older cancer patients with a cognitive impairment were up to six times more likely to die than patients without a cognitive impairment. It should be noted that the increased risk of death due to a cognitive impairment was almost identical in univariate analyses (HR = 6.26) and in analyses stratified for diagnosis and disease metastatic status (HR = 6.13).

The second aim of this study was to compare the predictive value of a cognitive impairment to that of other vulnerabilities associated with older age. Loss of instrumental autonomy and fatigue were the only other vulnerabilities predicting survival at two years. This confirms results of other studies[[35,36](#)]. It is important to note that a cognitive impairment had a predictive value similar to the one of fatigue and twice that of a loss of autonomy, and that both factors were weakly correlated with MoCA scores. Results of this study suggest that a cognitive impairment is an independent risk factor of death during 2 years of follow-up in older patients, regardless of the presence of other well-characterized medical or geriatric risk factors.



**Table 3. Associations between sociodemographic characteristics, disease-related characteristics, Cognitive Impairment (CI) and other geriatric vulnerabilities of older patients at the time of cancer treatment initiation, and two-year survival: Univariate Cox regressions.**

|                                                                         | HR    | 95% CI        | P      |
|-------------------------------------------------------------------------|-------|---------------|--------|
| <b>Sociodemographic characteristics</b>                                 |       |               |        |
| Age                                                                     | 1.04  | 0.98 to 1.11  | 0.216  |
| Men vs. women                                                           | 1.61  | 0.72 to 3.62  | 0.250  |
| Junior high school or lower vs. high school graduation or higher degree | 1.38  | 0.59 to 3.23  | 0.457  |
| Alone vs. with partner, family, in nursing home or in institution*      | 1.16  | 0.51 to 2.66  | 0.721  |
| <b>Disease-related characteristics</b>                                  |       |               |        |
| Colon cancer vs. breast or prostate cancer                              | 4.92  | 2.11 to 11.50 | <0.001 |
| Cancer recurrence vs. initial cancer                                    | 5.26  | 2.36 to 11.70 | <0.001 |
| Metastatic vs. non-metastatic                                           | 15.81 | 6.91 to 36.17 | <0.001 |
| Adjuvant chemotherapy scheduled vs. no adjuvant chemotherapy scheduled* | 3.89  | 1.71 to 8.88  | 0.001  |
| High-very high surgery vs. low-middle surgery**                         | 5.26  | 2.30 to 12.02 | <0.001 |
| Postoperative length                                                    | 1.05  | 1.01 to 1.09  | 0.016  |
| Postoperative complications vs. non postoperative complications***      | 3.60  | 1.08 to 12.08 | 0.038  |
| <b>Cognitive Impairment (CI)</b>                                        |       |               |        |
| Montreal Cognitive Assessment (MoCA<26)                                 | 6.26  | 2.14 to 18.31 | 0.001  |
| <b>Other geriatric vulnerabilities****</b>                              |       |               |        |
| Mini Mental State Examination (MMSE)                                    | 1.70  | 0.40 to 7.23  | 0.473  |
| Activities of Daily Living (ADL)                                        | 1.86  | 0.25 to 13.75 | 0.545  |
| Instrumental Activities of Daily Living (IADL)                          | 3.05  | 1.34 to 6.97  | 0.008  |
| Time-up and Go test (TUG)*                                              | 1.72  | 0.23 to 12.84 | 0.595  |
| Falls during the last year (Falls)*                                     | 1.28  | 0.30 to 5.44  | 0.742  |
| Mobility-tiredness scale (Mob-t)                                        | 4.20  | 1.80 to 9.81  | 0.001  |
| Mini Nutritional Assessment (MNA)                                       | 1.78  | 0.71 to 4.49  | 0.221  |
| Hospital Anxiety and Depression Scale (HADS)                            | 1.82  | 0.82 to 4.06  | 0.144  |
| Geriatric Depression Scale four items (GDS-4)                           | 1.30  | 0.56 to 3.04  | 0.545  |
| Number of drugs (Drugs)                                                 | 1.09  | 0.47 to 2.55  | 0.842  |
| Charlson Comorbidity Index (CCI)                                        | 2.92  | 1.16 to 7.34  | 0.023  |

\*Percentages do not take missing data into account

\*\*Assessed with the Possum scale

\*\*\*Any medical complication reported in medical records

\*\*\*\*Each tool was scored on a dichotomous scale, based on individual cut-off points reported in the literature

doi:10.1371/journal.pone.0159734.t003

The relatively high prevalence of a cognitive impairment observed at baseline (46%) is consistent with results from other recent studies that noted the high rates of cognitive impairments in patients at treatment initiation[37]. These cognitive impairments may be due to aging and/or to the adverse biological effects of cancer itself, known as the “cancerbrain” concept, through increased inflammation, unregulated cytokines, or oxidative stresses[11,37]. It should be also noted that 30% of the recruited patients were assessed the second day following surgery. Some observed cognitive impairments could thus be induced by general anesthesia[14,38]. It should be also noted that 17% of the recruited patients were admitted for surgery for recurrent solid tumors. The observed cognitive impairments could also be partly due to long-term side-effects of previous cancer treatments such as chemotherapy[15]. Finally, it should be recalled at this level that if patients in this study were excluded if they had a diagnosis of dementia (i.e. loss of functional autonomy, disorientation, and severe memory problems), many studies have found under detection of dementia in clinical populations[39].

**Table 4. Associations between Cognitive Impairment (CI) and other geriatric vulnerabilities of older patients at the time of cancer treatment initiation, and two-year survival\*: Multivariate Cox regressions stratified for diagnosis and disease status\*\*.**

|                                                | HR   | 95% CI        | P      |
|------------------------------------------------|------|---------------|--------|
| <b>Cognitive Impairment (CI)</b>               |      |               |        |
| Montreal Cognitive Assessment (MoCA<26)        | 6.13 | 2.07 to 18.09 | 0.001  |
| <b>Other geriatric vulnerabilities***</b>      |      |               |        |
| Instrumental Activities of Daily Living (IADL) | 3.06 | 1.31 to 7.11  | 0.009  |
| Mobility-tiredness scale (Mob-t)               | 5.98 | 2.47 to 14.44 | <0.001 |
| Charlson Comorbidity Index (CCI)               | 2.08 | 0.82 to 5.29  | 0.125  |

\*Analysis was limited by the number of events we reached at two years (n = 24), therefore subsequent multivariate Cox regressions stratified for diagnosis and disease status were performed

\*\*Non-metastatic breast/prostate cancer vs. metastatic breast/prostate cancer vs. metastatic colon cancer. No non-metastatic colorectal cancer died during the follow-up

\*\*\*Each tool was scored on a dichotomous scale, based on individual cut-off points reported in the literature; MMSE, ADL, TUG, Falls, MNA, HADS, GDS-4, Drugs were not included in the multivariate analyses because they were not associated with two-year survival in univariate analyses

doi:10.1371/journal.pone.0159734.t004

This study did not seek to investigate the processes by which cognitive impairments predicted a shortened survival. Nevertheless, only 4% of patients developed post-operative complications and 62% of observed deaths occurred after one-year, mainly due to disease progression (83%). From these observations, we can exclude that the majority of observed deaths were due to surgical complications or an adjuvant overtreatment of patients with frailties or compromised physiological function. Having a cognitive impairment at the initiation of cancer treatment seems to predict death for causes other than life-threatening surgical complications or adjuvant overtreatment of patients.

In this study, a cognitive impairment detected by the MMSE (<27) was not a significant predictor of survival in any of the analyses performed. There are two possible explanations that may account for these results. First, few patients were found to be vulnerable by the MMSE (<27) (13%), reducing the potential predictive power of impairments detected by this scale. Second, although the MMSE is useful to detect severe cognitive impairment in clinical settings, it is less sensitive to subtle impairments than the MoCA is [17–19].

If further studies confirm that a cognitive impairment at cancer treatment initiation predicts survival in older patients, we suggest that cognitive impairment should be screened in this population in order to appropriately implement four supportive interventions to reduce morbidity and mortality for cognitively vulnerable patients (MoCA <26). First, it should be recalled, of course, that any positive screening score should be confirmed by a comprehensive cognitive assessment realized by a neuropsychologist and/or a medical specialist in memory disorders. Second, if diagnosis of a cognitive impairment is confirmed, we suggest that physicians and other health care professionals inform older patients about that. Furthermore, specific interventions that are needed should be explained to them. Third, we suggest that physicians propose to repeat cognitive assessments at least one year following surgery and modify the course of the potential adjuvant treatments according to the evolution of impairments. Fourth, we suggest proposing support interventions to increase compliance among patients with cognitive impairments regarding cancer treatment and management of acute symptoms such as fever, nausea, or pain. Potentially useful strategies that could be considered to increase compliance among patients with cognitive impairments include comprehensive patient education, neuropsychological consultations, medication review, intensive post-discharge follow-up, and home-

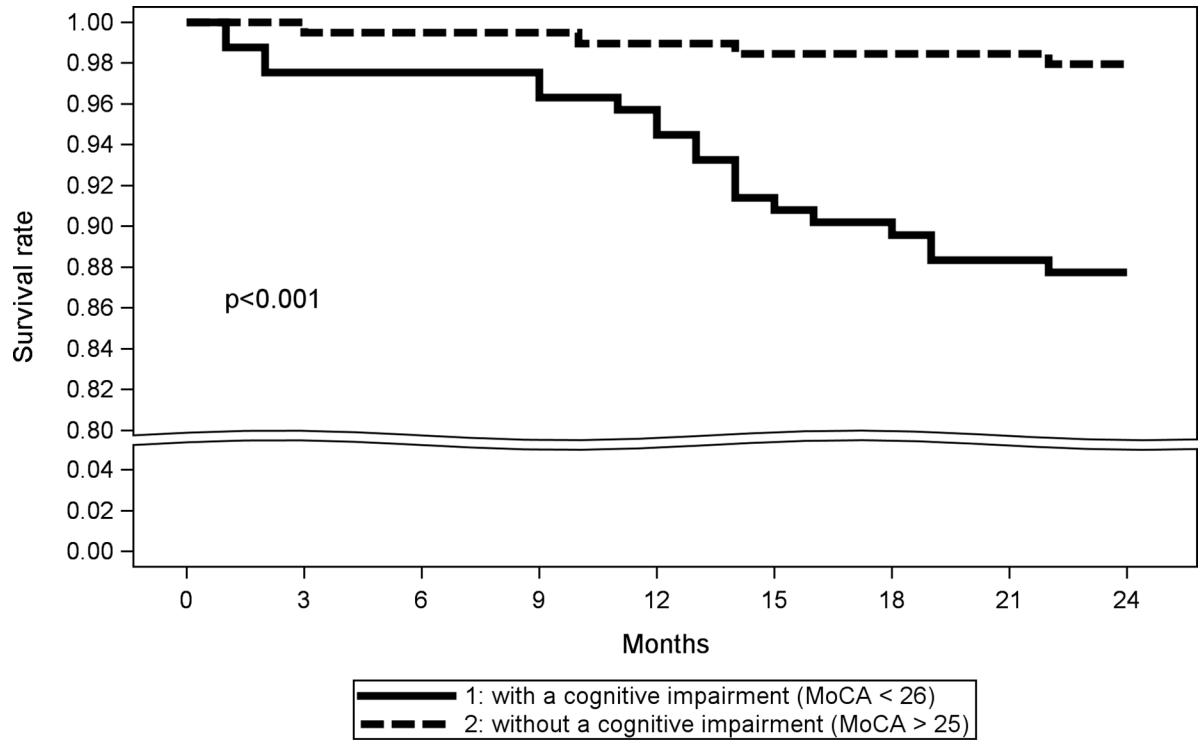

|   |     |     |     |     |     |     |     |     |     |
|---|-----|-----|-----|-----|-----|-----|-----|-----|-----|
| 1 | 163 | 159 | 159 | 159 | 156 | 149 | 147 | 144 | 143 |
| 2 | 194 | 194 | 193 | 193 | 192 | 191 | 191 | 191 | 190 |

**Fig 1. Kaplan-Meier overall survival estimates of two-year overall survival between older patients without a cognitive impairment (MoCA  $\geq 26$ ; n = 4) and patients with a cognitive impairment (MoCA  $< 26$ ; n = 20) when treatment for breast, prostate, or colorectal cancer is initiated.**

doi:10.1371/journal.pone.0159734.g001

based interventions[40,41]. Informal primary caregivers and family physicians should be included in these supportive interventions in order to maximize their usefulness and potential benefits.

To our knowledge, this is the first study aimed at investigating how much a cognitive impairment detected at the initiation of cancer treatment influences survival of older patients during a two-year follow-up duration and at comparing the predictive value of a cognitive impairment on patients' survival with the predictive value of other vulnerabilities. The MoCA and other measures included in the geriatric assessment are valid measures and provide a comprehensive picture of relevant vulnerabilities in this specific population. The results of this study have important potential practical implications and are in the line with the growing literature on the importance of detecting cognitive impairments not only in older people with cancer, but in other medical contexts. Future prospective studies should assess how much cognitive impairments predict survival in others settings (i.e., within a follow-ups of 3, 4, and 5 years; among outpatients; among patients with unfavorable prognoses; or among frail patients), with other measures combining for example MoCA cut-off scores and other cognitive tests, with larger samples to improve the power of survival prediction. Prospective studies, should also assess whether subgroups with severe versus milder cognitive impairments experience similar rates of mortality. Moreover, future prospective studies should include an

assessment of any adjuvant cancer treatment and assessments of patient compliance with medical recommendations in order to better understand the processes by which cognitive impairments could reduce survival in older cancer patients. Among these processes, prospective studies should also assess biomarkers of aging that are also associated with cognitive impairments and survival (i.e. cell senescence, inflammation, hormone levels, DNA damage, oxidative stress, or telomere length). Prospective studies should also include repeated measures of cognitive impairments in order to investigate the advancement of impairments and their potential impact on survival. Finally, prospective studies should investigate the potential benefits of supportive interventions based on cognitive impairments screening that aim to reduce morbidity and mortality of older cancer patients.

In conclusion, during the two years following cancer treatment initiation, older cancer patients with a cognitive impairment may have up to six times greater risk of dying than patients without. A cognitive impairment may be an indication of a patient's biological, medical, psychological, and social vulnerabilities. Older patients should be screened for cognitive impairments at cancer treatment initiation in order to propose supportive interventions aiming to reduce morbidity and mortality. Further studies should address processes underlying the relationship between cognitive impairments and an increased risk of dying among older cancer patients.

## Acknowledgments

This research program was supported by the National Cancer Plan of Belgium 2009–2011; grant number: NKP-24-005 (Cindy Kenis and Pr. Hans Wildfires), the Centre de Psycho-Oncology (Training and Research Group) of Belgium, the Institute Jules Bordet, the University Libre de Bruxelles, the University Catholique de Louvain and by a grant provided by the "Fonds National de la Recherche Scientifique–Section Télévie" of Belgium. We would like to thank patients who participated in this study and all the people who directly contributed to: the study conception and design (Yves Libert, Darius Razavi, Dominique Bron), the data collection (Cindy Borghgraef, Marie Caillier, Aurélie Collard, Lissandra Dal Lago, Stéphanie Dubruille, Alexandra Joris, Marie Maerevoet, Batula Massaut, Nathalie Meuleman, Myriam Roos, Jean-Louis Slachmuylder, Sandrine Vandebossche) and the data analysis (Stéphanie Dubruille, Marianne Paesmans, Jean-Louis Slachmuylders).

## Author Contributions

Conceived and designed the experiments: YL DR DB. Performed the experiments: YL CB SD MR JLS SV DR. Analyzed the data: SD MP JLS DR. Contributed reagents/materials/analysis tools: MP. Wrote the paper: YL SD IM MP DB DR. Supervised the general scientific management of the study: YL DR DB CR AME.

## References

1. Neuman HB, O'Connor ES, Weiss J, Loconte NK, Greenblatt DY, Greenberg CC, et al. (2013) Surgical treatment of colon cancer in patients aged 80 years and older: analysis of 31,574 patients in the SEER-Medicare database. *Cancer* 119: 639–647. doi: [10.1002/cncr.27765](https://doi.org/10.1002/cncr.27765) PMID: [22893570](https://pubmed.ncbi.nlm.nih.gov/22893570/)
2. Goodwin JS, Samet JM, Hunt WC (1996) Determinants of survival in older cancer patients. *J Natl Cancer Inst* 88: 1031–1038. PMID: [8683633](https://pubmed.ncbi.nlm.nih.gov/8683633/)
3. Louwman WJ, Janssen-Heijnen ML, Houterman S, Voogd AC, van der Sangen MJ, Nieuwenhuijzen GA, et al. (2005) Less extensive treatment and inferior prognosis for breast cancer patient with comorbidity: a population-based study. *Eur J Cancer* 41: 779–785. PMID: [15763655](https://pubmed.ncbi.nlm.nih.gov/15763655/)
4. Robb C, Boulware D, Overcash J, Extermann M (2010) Patterns of care and survival in cancer patients with cognitive impairment. *Crit Rev Oncol Hematol* 74: 218–224. doi: [10.1016/j.critrevonc.2009.07.002](https://doi.org/10.1016/j.critrevonc.2009.07.002) PMID: [19709899](https://pubmed.ncbi.nlm.nih.gov/19709899/)

5. Gussekloo J, Westendorp RG, Remarque EJ, Lagaay AM, Heeren TJ, Knook DL (1997) Impact of mild cognitive impairment on survival in very elderly people: cohort study. *BMJ* 315: 1053–1054. PMID: [9366730](#)
6. Dubraille S, Libert Y, Roos M, Vandenbossche S, Collard A, Meuleman N, et al. (2015) Identification of clinical parameters predictive of one-year survival using two geriatric tools in clinically fit older patients with hematological malignancies: Major impact of cognition. *J Geriatr Oncol* 6: 362–369. doi: [10.1016/j.jgo.2015.07.006](#) PMID: [26277114](#)
7. Dubraille S, Libert Y, Merckaert I, Reynaert C, Vandenbossche S, Roos M, et al. (2015) The prevalence and implications of elderly inpatients' desire for a formal psychological help at the start of cancer treatment. *Psychooncology* 24: 294–301. doi: [10.1002/pon.3636](#) PMID: [25080106](#)
8. Swan GE, Carmelli D, LaRue A (1995) Performance on the digit symbol substitution test and 5-year mortality in the Western Collaborative Group Study. *Am J Epidemiol* 141: 32–40. PMID: [7801963](#)
9. Anstey KJ, Luszcz MA, Giles LC, Andrews GR (2001) Demographic, health, cognitive, and sensory variables as predictors of mortality in very old adults. *Psychol Aging* 16: 3–11. PMID: [11302365](#)
10. Mandelblatt JS, Jacobsen PB, Ahles T (2014) Cognitive effects of cancer systemic therapy: implications for the care of older patients and survivors. *J Clin Oncol* 32: 2617–2626. doi: [10.1200/JCO.2014.55.1259](#) PMID: [25071135](#)
11. Lange M, Rigal O, Clarisse B, Giffard B, Sevin E, Barillet M, et al. (2014) Cognitive dysfunctions in elderly cancer patients: a new challenge for oncologists. *Cancer Treat Rev* 40: 810–817. doi: [10.1016/j.ctrv.2014.03.003](#) PMID: [24713425](#)
12. Etgen T, Bickel H, Forstl H (2010) Metabolic and endocrine factors in mild cognitive impairment. *Ageing Res Rev* 9: 280–288. doi: [10.1016/j.arr.2010.01.003](#) PMID: [20109582](#)
13. Raji MA, Kuo YF, Freeman JL, Goodwin JS (2008) Effect of a dementia diagnosis on survival of older patients after a diagnosis of breast, colon, or prostate cancer: implications for cancer care. *Arch Intern Med* 168: 2033–2040. doi: [10.1001/archinte.168.18.2033](#) PMID: [18852406](#)
14. Inouye SK (2006) Delirium in older persons. *N Engl J Med* 354: 1157–1165. PMID: [16540616](#)
15. Ahles TA (2012) Brain vulnerability to chemotherapy toxicities. *Psychooncology* 21: 1141–1148. doi: [10.1002/pon.3196](#) PMID: [23023994](#)
16. Amieva H, Stoykova R, Matharan F, Helmer C, Antonucci TC, Dartigues JF (2010) What aspects of social network are protective for dementia? Not the quantity but the quality of social interactions is protective up to 15 years later. *Psychosom Med* 72: 905–911. doi: [10.1097/PSY.0b013e3181f5e121](#) PMID: [20807876](#)
17. Nasreddine ZS, Phillips NA, Bedirian V, Charbonneau S, Whitehead V, Collin I, et al. (2005) The Montreal Cognitive Assessment, MoCA: a brief screening tool for mild cognitive impairment. *J Am Geriatr Soc* 53: 695–699. PMID: [15817019](#)
18. Newman JC (2015) Copyright and Bedside Cognitive Testing: Why We Need Alternatives to the Mini-Mental State Examination. *JAMA Intern Med* 175: 1459–1460. doi: [10.1001/jamainternmed.2015.2159](#) PMID: [26053392](#)
19. Tsoi KK, Chan JY, Hirai HW, Wong SY, Kwok TC (2015) Cognitive Tests to Detect Dementia: A Systematic Review and Meta-analysis. *JAMA Intern Med* 175: 1450–1458. doi: [10.1001/jamainternmed.2015.2152](#) PMID: [26052687](#)
20. Petersen RC, Thomas RG, Grundman M, Bennett D, Doody R, Ferris S, et al. (2005) Vitamin E and donepezil for the treatment of mild cognitive impairment. *N Engl J Med* 352: 2379–2388. PMID: [15829527](#)
21. Petersen RC, Doody R, Kurz A, Mohs RC, Morris JC, Rabins PV, et al. (2001) Current concepts in mild cognitive impairment. *Arch Neurol* 58: 1985–1992. PMID: [11735772](#)
22. Copeland GP, Jones D, Walters M (1991) POSSUM: a scoring system for surgical audit. *Br J Surg* 78: 355–360. PMID: [2021856](#)
23. McLennan SN, Mathias JL, Brennan LC, Stewart S (2011) Validity of the montreal cognitive assessment (MoCA) as a screening test for mild cognitive impairment (MCI) in a cardiovascular population. *J Geriatr Psychiatry Neurol* 24: 33–38. doi: [10.1177/0891988710390813](#) PMID: [21156989](#)
24. Katz S, Downs TD, Cash HR, Grotz RC (1970) Progress in development of the index of ADL. *Gerontologist* 10: 20–30. PMID: [5420677](#)
25. Lawton MP, Brody EM (1969) Assessment of older people: self-maintaining and instrumental activities of daily living. *Gerontologist* 9: 179–186. PMID: [5349366](#)
26. Podsiadlo D, Richardson S (1991) The timed "Up & Go": a test of basic functional mobility for frail elderly persons. *J Am Geriatr Soc* 39: 142–148. PMID: [1991946](#)

27. Fieo RA, Mortensen EL, Rantanen T, Avlund K (2013) Improving a measure of mobility-related fatigue (the mobility-tiredness scale) by establishing item intensity. *J Am Geriatr Soc* 61: 429–433. doi: [10.1111/jgs.12122](https://doi.org/10.1111/jgs.12122) PMID: [23452001](https://pubmed.ncbi.nlm.nih.gov/23452001/)
28. Guigoz Y, Vellas B, Garry PJ (1996) Assessing the nutritional status of the elderly: The Mini Nutritional Assessment as part of the geriatric evaluation. *Nutr Rev* 54: S59–65.
29. Zigmond AS, Snaith RP (1983) The hospital anxiety and depression scale. *Acta Psychiatr Scand* 67: 361–370. PMID: [6880820](https://pubmed.ncbi.nlm.nih.gov/6880820/)
30. Sheikh JI YJ (1986) *Geriatric Depression Scale (GDS): Recent evidence and development of a shorter version*. New-york: The Haworth Press.
31. Gnjjidic D, Hilmer SN, Blyth FM, Naganathan V, Waite L, Seibel MJ, et al. (2012) Polypharmacy cutoff and outcomes: five or more medicines were used to identify community-dwelling older men at risk of different adverse outcomes. *J Clin Epidemiol* 65: 989–995. doi: [10.1016/j.jclinepi.2012.02.018](https://doi.org/10.1016/j.jclinepi.2012.02.018) PMID: [22742913](https://pubmed.ncbi.nlm.nih.gov/22742913/)
32. Charlson ME, Pompei P, Ales KL, MacKenzie CR (1987) A new method of classifying prognostic comorbidity in longitudinal studies: development and validation. *J Chronic Dis* 40: 373–383. PMID: [3558716](https://pubmed.ncbi.nlm.nih.gov/3558716/)
33. Razavi D, Delvaux N, Farvacques C, Robaye E (1990) Screening for adjustment disorders and major depressive disorders in cancer in-patients. *Br J Psychiatry* 156: 79–83. PMID: [2297623](https://pubmed.ncbi.nlm.nih.gov/2297623/)
34. Kamangar F, Dores GM, Anderson WF (2006) Patterns of cancer incidence, mortality, and prevalence across five continents: defining priorities to reduce cancer disparities in different geographic regions of the world. *J Clin Oncol* 24: 2137–2150. PMID: [16682732](https://pubmed.ncbi.nlm.nih.gov/16682732/)
35. Balducci L (2006) Management of cancer in the elderly. *Oncology (Williston Park)* 20: 135–143; discussion 144, 146, 151–132.
36. Avlund K, Schultz-Larsen K, Davidsen M (1998) Tiredness in daily activities at age 70 as a predictor of mortality during the next 10 years. *J Clin Epidemiol* 51: 323–333. PMID: [9539889](https://pubmed.ncbi.nlm.nih.gov/9539889/)
37. Lange M, Giffard B, Noal S, Rigal O, Kurtz JE, Heutte N, et al. (2014) Baseline cognitive functions among elderly patients with localised breast cancer. *Eur J Cancer* 50: 2181–2189. doi: [10.1016/j.ejca.2014.05.026](https://doi.org/10.1016/j.ejca.2014.05.026) PMID: [24958735](https://pubmed.ncbi.nlm.nih.gov/24958735/)
38. Monk TG, Weldon BC, Garvan CW, Dede DE, van der Aa MT, Heilman KM, et al. (2008) Predictors of cognitive dysfunction after major noncardiac surgery. *Anesthesiology* 108: 18–30. PMID: [18156878](https://pubmed.ncbi.nlm.nih.gov/18156878/)
39. Dong Y, Lee WY, Basri NA, Collinson SL, Merchant RA, Venketasubramanian N, et al. (2012) The Montreal Cognitive Assessment is superior to the Mini-Mental State Examination in detecting patients at higher risk of dementia. *Int Psychogeriatr* 24: 1749–1755. doi: [10.1017/S1041610212001068](https://doi.org/10.1017/S1041610212001068) PMID: [22687278](https://pubmed.ncbi.nlm.nih.gov/22687278/)
40. Rich MW, Gray DB, Beckham V, Wittenberg C, Luther P (1996) Effect of a multidisciplinary intervention on medication compliance in elderly patients with congestive heart failure. *Am J Med* 101: 270–276. PMID: [8873488](https://pubmed.ncbi.nlm.nih.gov/8873488/)
41. Stewart S, Marley JE, Horowitz JD (1999) Effects of a multidisciplinary, home-based intervention on unplanned readmissions and survival among patients with chronic congestive heart failure: a randomised controlled study. *Lancet* 354: 1077–1083. PMID: [10509499](https://pubmed.ncbi.nlm.nih.gov/10509499/)
